# Supplementary material
Source: Springer Nature journal article supplement (https://www.springermedizin.de/resource/supplementary/12879_2010_1188_MOESM1_ESM.pdf/9442046)
Supplement: MOESM1 [file 9442046]

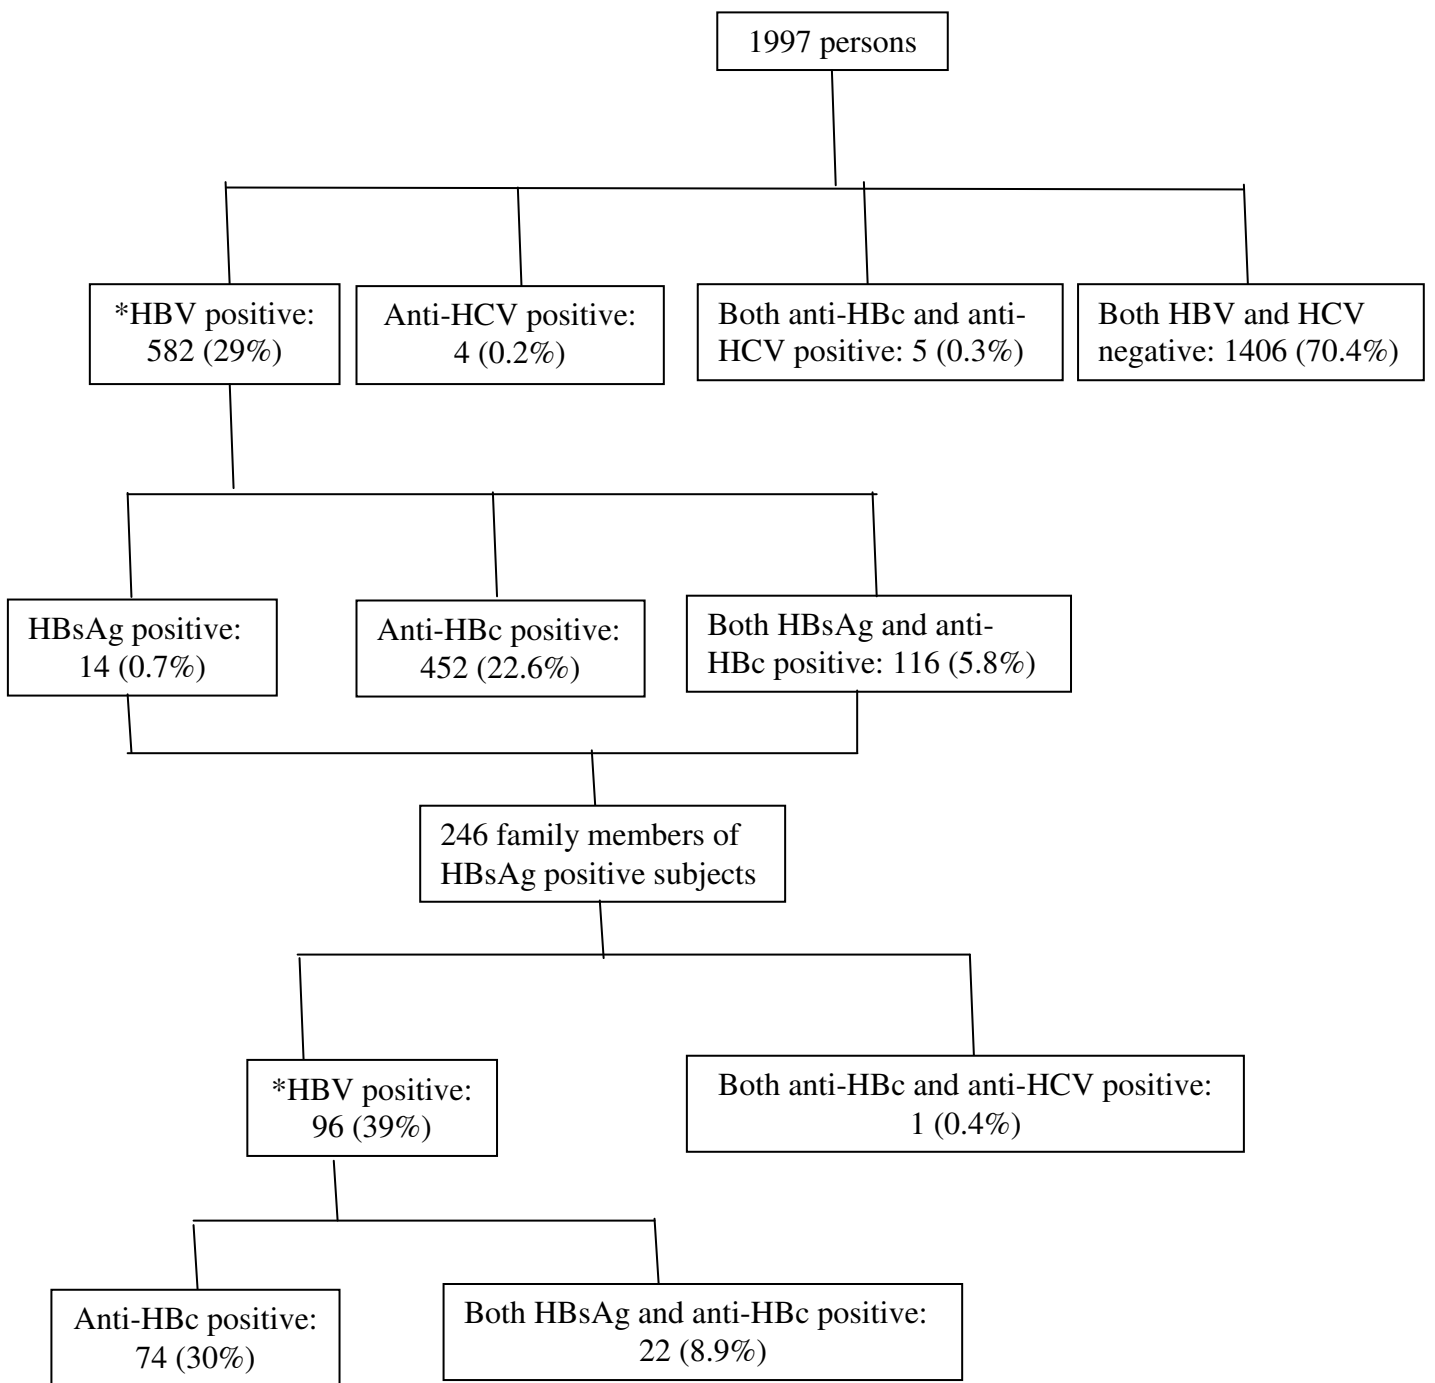

(Note: \*HBV-seropositivity includes HBsAg positive/anti-HBc positive/both HBsAg and anti-HBc positive study participants)
